# Supplementary material for: Monitoring the 5-methoxycarbonylmethyl-2-thiouridine (mcm5s2U) modification in eukaryotic tRNAs via the γ-toxin endonuclease
Source: PubMed Central journal article supplement — RNA. 2018 May;24(5):749–58. doi: 10.1261/rna.065581.118 (PMC5900570; doi:10.1261/rna.065581.118), 2018-05
Supplement: supp_065581.118_Supplemental_Material.pdf [file supp_065581.118_Supplemental_Material.pdf]

Supplemental Table 1. Oligonucleotides

| <b>Northern blot probes</b>           | <b>Sequence (5'-3')</b>            |
|---------------------------------------|------------------------------------|
| Yeast Glu TTC 5'                      | AGCCGTTACACTATATCGGA               |
| Yeast Ser CGA 5'                      | CTCTCGCCTTAACCACTCGGCCATAGTGCC     |
| Yeast Gln TTG 5'                      | GAAAGTGATAACCACTACACTATAGGACC      |
| Yeast Lys TTT 3'                      | CTCCTCATAGGGGGCTC                  |
| Human Glu TTC 5'                      | CCAGGAATCCTAACCGCTAGACCATRGGGA     |
| Human Ser CGA 5'                      | GCCTTAACCACTCGGCCATCACAGC          |
| Human Lys TTT 5'                      | TGATGCTCTACCRACCTGAGCTATCCRGGC     |
| Human Gln TTG 3'                      | AGGTCCCACCGAGATTGAACTCG            |
| Human Arg TCT                         | CCAATGGCTATCCATTGCGCCACAGA         |
| Human Arg TCG 3'                      | GGCAGGACTCGAACCTGCAaTCTTC          |
| Human Gly TCC 5'                      | CAGCTATGCTAACCACTATACCACCAACGC     |
| Human Sec TGA 5'                      | CTGCACCCAGACCACTGAGGATCAT          |
| Human U6 snRNA                        | CGTTCCAATTTTAGTATATGTGCTGCCGAAGCGA |
| <i>E. coli</i> Glu                    | GCGGTGTCTGGGCCTTAGACG              |
| Tetrahymena Glu TTC 5'                | CCTAACCTGCTAGACTATAGGGGA           |
| Tetrahymena Ser CGA 5'                | AACCTCCTTAACCACTCGGACAACTGAC       |
| <i>C. elegans</i> Glu TTC 5'          | GAATCCTAACCACTAGACCACATGGGA        |
| <i>C. elegans</i> Ser CGA 5'          | ACTCCTTAACCACTCGGACATGACTGC        |
| <i>D. melanogaster</i> Glu TTC 5'     | CCAGATATCCTaGCCACTAGACCATATGGGA    |
| <i>D. melanogaster</i> Ser AGA/CGA 5' | ACGCCTTAACCACTCGGCCACGACTGC        |
| <i>X. laevis</i> Glu TTC 5'           | GGAATCCTAACCGCTAGACCATAT           |
| <i>X. laevis</i> Ser CGA 5'           | GCCTTAACCACTCGGCCATCACA            |
| Mouse Glu TTC 5'                      | GGAATCCTAACCGCTAGACCATGTGGGA       |
| Mouse Ser CGA 5'                      | GCCTTAACCACTCGGCCATCACAGC          |
| <b>QRT-PCR primers</b>                |                                    |
| sc-tRNA-Glu-TTC-F1                    | TCCGATATAGTGTAACGGctAT             |
| sc-tRNA-Glu-TTC-R1                    | CTCCGATACGGGGAGTCG                 |
| Yeast 25s rRNA Forward                | GAAATCTGGTACCTTCGGTG               |
| Yeast 25s rRNA Reverse                | GATTCTCACCCCTCTATGACG              |
| hs-tRNA-Glu-TTC-F1                    | TGGTCTAGYGGYtAGGATTC               |
| hs-tRNA-Glu-TTC-R1                    | ACCGGGARTCGAACCCGGGC               |
| Human 5.8s Forward                    | GGTGGATCACTCGGCTCGT                |
| Human 5.8s Reverse                    | GCAAGTGCGTTCGAAGTGTC               |

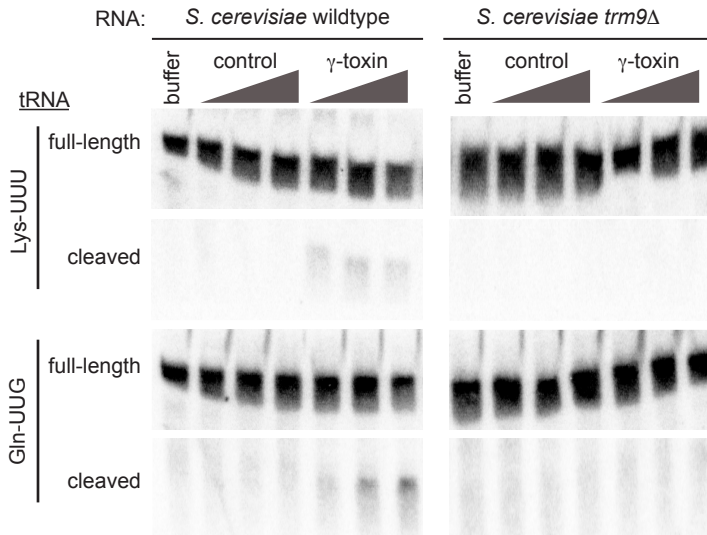

**Supplemental Figure 1.** Gamma-toxin cleavage of *S. cerevisiae* tRNA-Gln-UUG and Lys-UUU. Northern blots of *S. cerevisiae* Wild-type and *trm9Δ* RNA incubated with buffer alone or increasing amounts of control purification or purified gamma-toxin. The blot was hybridized with probes against tRNA-Lys-UUU and tRNA-Gln-UUG.

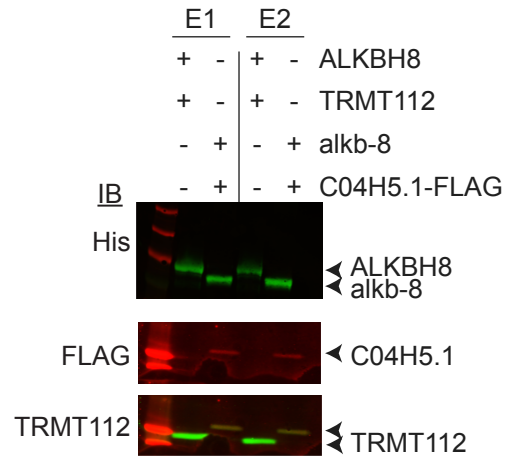

**Supplemental Figure 2.** Immunoblot verification of Trm9-Trm112 copurification. Elutions 1 and 2 of purified protein expressed in *E. coli* bacterial cells were visualized by western blotting and antibodies against hexa-histidine tag, 3X-FLAG tag, and TRMT112 were used.

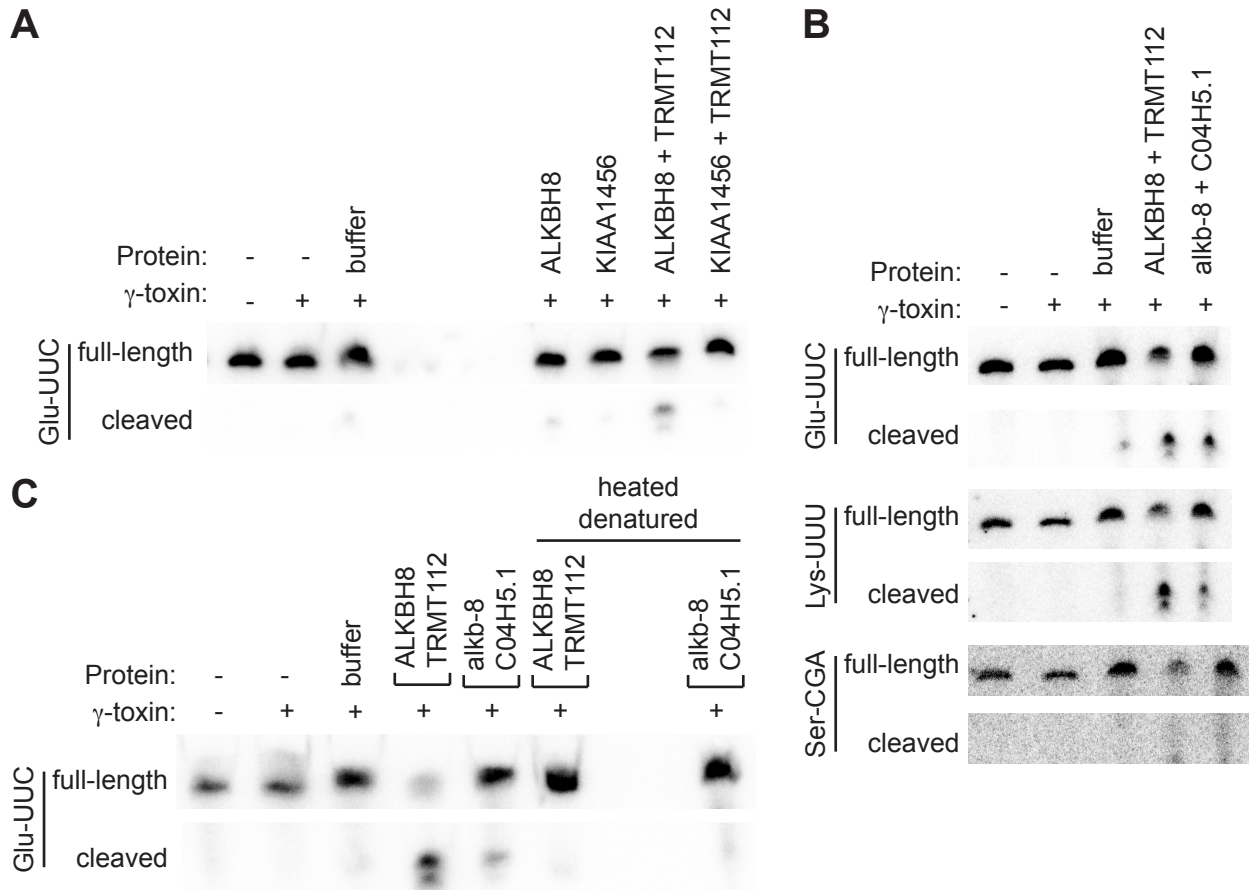

**Supplemental Figure 3.** Gamma-toxin cleavage of *Trm9 $\Delta$*  RNA requires active Trm9-Trm112 enzyme complexes and is specific for mcm5s2U-containing tRNAs. Northern blots of *S. cerevisiae Trm9 $\Delta$*  RNA pre-incubated with the indicated buffers or proteins followed by treatment with purified gamma-toxin. (A) Purified eukaryotic Trm9 proteins with or without Trm112 subunit were pre-incubated with *Trm9 $\Delta$*  RNA followed by the gamma-toxin assay. KIAA1456 represents another human protein with homology to yeast Trm9 but displays no methyltransferase activity. (B) Purified *H. sapiens* or *C. elegans* Trm9-Trm112 complexes were pre-incubated with *Trm9 $\Delta$*  RNA followed by treatment with purified gamma-toxin. (C) *Trm9 $\Delta$*  RNA was pre-incubated with *H. sapiens* or *C. elegans* Trm9-Trm112 complexes that were either mock-treated or heat denatured followed by the gamma-toxin assay.
